# Supplementary material
Source: publisher figshare collection journal article supplement (https://sage.figshare.com/ndownloader/files/16107149)
Supplement: Supplementary file 1 [file 16107149]

## SUPPLEMENTAL MATERIAL

Table 1 S

*Percentages and Frequencies of Demographic Characteristics*

|                                          | Women sample |          |
|------------------------------------------|--------------|----------|
|                                          | %            | <i>n</i> |
| <b>Age</b>                               |              |          |
| 15-18                                    | 1.1          | 17       |
| 19-24                                    | 10.3         | 161      |
| 25-35                                    | 36.6         | 571      |
| 36-59                                    | 49.2         | 768      |
| 60-72                                    | 2.8          | 43       |
| <b>Number of children<sup>a</sup></b>    |              |          |
| None                                     | 0.6          | 8        |
| 1-2                                      | 34.2         | 460      |
| 3-7                                      | 61.2         | 822      |
| 8 or more                                | 4.0          | 54       |
| <b>Education</b>                         |              |          |
| No formal schooling                      | 31.8         | 494      |
| Primary school                           | 47.0         | 730      |
| High school                              | 13.7         | 213      |
| University degree                        | 5.6          | 87       |
| Other                                    | 1.8          | 30       |
| <b>Family monthly income<sup>b</sup></b> |              |          |
| Very low                                 | 14.4         | 221      |
| Low                                      | 39.3         | 603      |
| Moderate                                 | 25.6         | 393      |
| High e                                   | 9.5          | 145      |
| No income                                | 11.2         | 171      |
| <b>Own economic status</b>               |              |          |
| No own income                            | 69.4         | 1048     |

|                          |      |     |
|--------------------------|------|-----|
| Works in paid job        | 12.3 | 186 |
| Other income             | 18.3 | 276 |
| Working status of spouse |      |     |
| Not working              | 28.3 | 365 |
| Half time                | 12.6 | 162 |
| Full time                | 59.1 | 762 |
| Ethnic origin            |      |     |
| Turkish                  | 36.4 | 567 |
| Kurdish                  | 51.6 | 803 |
| Zaza                     | 6.0  | 94  |
| Arabic                   | 4.4  | 69  |
| Other                    | 1.5  | 24  |

---

*NOTE: Total N = 1569, Differences in numbers (varies between 1510 – 1560) are due to missing values*

<sup>a</sup> The distribution concerns women who are married (91.1%; N = 1418)

<sup>b</sup> Based on monthly income in Turkish Lira (TRY): Very low (< 500TL); low (500 - 999TL); moderate (1000 - 2499); High (2500TL or more);

1 USD = 3,80 TRY )

SUPPLEMENT MATERIAL

Table 2S

*Pearson's Product Moment Correlations between Demographic Factors, Traumatic Events, Mental Health Problems and Posttraumatic Cognitions*

|                                          | Demographic |        |        | Traumatic events |       |       | Mental health symptoms |         |    |     |     | Posttraumatic cognitions |     |
|------------------------------------------|-------------|--------|--------|------------------|-------|-------|------------------------|---------|----|-----|-----|--------------------------|-----|
|                                          | 1.          | 2.     | 3.     | 4.               | 5.    | 6.    | 7.                     | 8.      | 9. | 10. | 11. | 12.                      | 13. |
| 1. Age of the woman                      | 1           |        |        |                  |       |       |                        |         |    |     |     |                          |     |
| 2. Education                             | -.25**      | 1      |        |                  |       |       |                        |         |    |     |     |                          |     |
| 3. Economic stand                        | .03         | .30**  | 1      |                  |       |       |                        |         |    |     |     |                          |     |
| 4. Interpersonal violence (IPV)          | -.03        | .02    | -.08** | 1                |       |       |                        |         |    |     |     |                          |     |
| 5. Natural disasters and accidents (NDA) | .02         | .04    | .02    | .00              | 1     |       |                        |         |    |     |     |                          |     |
| 6. Life-threat and war trauma (LTW)      | .01         | -.05*  | -.06*  | .00              | .00   | 1     |                        |         |    |     |     |                          |     |
| 7. PTSD-symptoms                         | .05*        | -.16** | -.16** | .25**            | .19** | .19** | 1                      |         |    |     |     |                          |     |
| 8. Depressive symptoms                   | .13**       | -.21** | -.21** | .20**            | .18** | .23** | .48****                | 1       |    |     |     |                          |     |
| 9. Somatization symptoms                 | .08*        | -.18** | -.21** | .25**            | .17** | .24** | .55****                | .75**** | 1  |     |     |                          |     |

|                                            |       |        |        |        |       |       |        |        |        |        |       |        |   |  |
|--------------------------------------------|-------|--------|--------|--------|-------|-------|--------|--------|--------|--------|-------|--------|---|--|
| 10. Social dysfunction                     | .12** | -.12** | -.11** | .17**  | .11** | .03   | .35*** | .53*** | .57*** | 1      |       |        |   |  |
| 11. Anxiety symptoms                       | -.01  | -.10** | -.15** | .30*** | .10** | .19** | .42*** | .59*** | .66*** | .55*** | 1     |        |   |  |
| 12. Self-related posttraumatic cognitions  | -.06* | -.10** | -.07*  | .10**  | .04   | .29** | .30*** | .28**  | .28**  | .16**  | .17** | 1      |   |  |
| 13. Other-related posttraumatic cognitions | .10** | -.17** | -.13** | .22**  | .16** | .01   | .56*** | .48*** | .55*** | .41*** | .09*  | .56*** | 1 |  |

Note: \* p <.05, \*\* p <.01; \*\*\* p <.001, \*\*\*\* p <.0001;
